# Supplementary material for: Expression of immune checkpoint regulators, programmed death-ligand 1 (PD-L1/PD-1), cytotoxic T lymphocyte antigen 4 (CTLA-4), and indolaimine-2, 3-deoxygenase (IDO) in uterine mesenchymal tumors
Source: PubMed Central journal article supplement (PMC9476344; doi:10.1186/s13000-022-01251-2), 2022-09-14
Supplement: 13000_2022_1251_MOESM2_ESM.pdf [file 13000_2022_1251_MOESM2_ESM.pdf]

**Additional Table 2.** Binary representation of positive (1) and negative (0) immunohistochemical (IHC) reactions of the immune checkpoints in patients with uterine mesenchymal tumors

| NO                        | Age | Diagnosis    | PD-L1 |     | PD-1 |     | CTLA-4 |     | IDO |     | Status | Combined |     |
|---------------------------|-----|--------------|-------|-----|------|-----|--------|-----|-----|-----|--------|----------|-----|
|                           |     |              | TCs   | LCs | TCs  | LCs | TCs    | LCs | TCs | LCs |        | TCs      | LCs |
| <b>Group-I (n = 11)</b>   |     |              |       |     |      |     |        |     |     |     |        |          |     |
| 1                         | 75  | LM           | 0     | 0   | 0    | 0   | 0      | 0   | 0   | 0   |        | 0        | 0   |
| 2                         | 40  | LM           | 0     | 0   | 0    | 0   | 0      | 0   | 0   | 0   |        | 0        | 0   |
| 3                         | 35  | LM           | 0     | 0   | 0    | 0   | 0      | 0   | 0   | 0   |        | 0        | 0   |
| 4                         | 33  | LM           | 0     | 0   | 0    | 0   | 0      | 0   | 0   | 0   |        | 0        | 0   |
| 5                         | 40  | LM           | 0     | 0   | 0    | 0   | 0      | 0   | 0   | 0   |        | 0        | 0   |
| 6                         | 40  | LM           | 0     | 0   | 0    | 0   | 0      | 0   | 0   | 0   |        | 0        | 0   |
| 7                         | 48  | LM           | 0     | 0   | 0    | 0   | 0      | 0   | 0   | 0   |        | 0        | 0   |
| 8                         | 40  | LM           | 0     | 0   | 0    | 0   | 0      | 0   | 0   | 0   |        | 0        | 0   |
| 9                         | 43  | LM           | 0     | 0   | 0    | 0   | 0      | 0   | 0   | 0   |        | 0        | 0   |
| 10                        | 34  | LM           | 0     | 0   | 0    | 0   | 0      | 0   | 0   | 0   |        | 0        | 0   |
| 11                        | 57  | LM           | 0     | 0   | 0    | 0   | 0      | 0   | 0   | 0   |        | 0        | 0   |
| <b>Group-II (n = 23)</b>  |     |              |       |     |      |     |        |     |     |     |        |          |     |
| 12                        | 68  | LMS          | 0     | 0   | 0    | 0   | 0      | 1   | 1   | 1   | NF     | 1        | 1   |
| 13                        | 77  | LMS          | 0     | 0   | 0    | 0   | 0      | 0   | 0   | 0   | A      | 0        | 0   |
| 14                        | 61  | LMS          | 0     | 0   | 0    | 0   | 1      | 0   | 1   | 1   | NF     | 1        | 1   |
| 15                        | 67  | LMS          | 0     | 0   | 0    | 0   | 0      | 0   | 0   | 0   | D      | 0        | 0   |
| 16                        | 41  | LMS          | 0     | 0   | 0    | 0   | 0      | 0   | 0   | 0   | D      | 0        | 0   |
| 17                        | 72  | LMS          | 0     | 0   | 0    | 0   | 1      | 0   | 1   | 0   | D      | 1        | 0   |
| 18                        | 37  | LMS          | 0     | 0   | 0    | 0   | 0      | 0   | 0   | 0   | NF     | 0        | 0   |
| 19                        | 53  | LMS          | 0     | 0   | 0    | 0   | 0      | 1   | 0   | 0   | D      | 0        | 1   |
| 20                        | 61  | LMS          | 0     | 0   | 0    | 0   | 0      | 0   | 0   | 0   | D      | 0        | 0   |
| 21                        | 58  | LMS          | 0     | 0   | 0    | 0   | 1      | 0   | 0   | 0   | D      | 1        | 0   |
| 22                        | 39  | LMS          | 0     | 1   | 0    | 1   | 0      | 0   | 0   | 1   | A      | 0        | 1   |
| 23                        | 45  | LMS          | 0     | 0   | 0    | 0   | 0      | 0   | 0   | 0   | A      | 0        | 0   |
| 24                        | 44  | LMS          | 0     | 0   | 0    | 0   | 0      | 0   | 0   | 0   | A      | 0        | 0   |
| 25                        | 75  | LMS          | 0     | 0   | 0    | 0   | 0      | 0   | 0   | 0   | D      | 0        | 0   |
| 26                        | 64  | LMS          | 0     | 0   | 0    | 0   | 0      | 0   | 0   | 0   | NF     | 0        | 0   |
| 27                        | 43  | LMS          | 0     | 0   | 0    | 0   | 0      | 0   | 0   | 0   | NF     | 0        | 0   |
| 28                        | 56  | LMS          | 0     | 1   | 0    | 1   | 0      | 1   | 0   | 1   | D      | 0        | 1   |
| 29                        | 70  | LMS          | 1     | 0   | 0    | 0   | 0      | 0   | 0   | 0   | D      | 1        | 0   |
| 30                        | 62  | LMS          | 1     | 0   | 0    | 1   | 0      | 1   | 0   | 1   | D      | 1        | 1   |
| 31                        | 71  | LMS          | 1     | 0   | 0    | 1   | 0      | 0   | 0   | 1   | A      | 1        | 1   |
| 32                        | 45  | LMS          | 1     | 0   | 0    | 1   | 0      | 0   | 0   | 0   | NF     | 1        | 1   |
| 33                        | 49  | LMS          | 1     | 0   | 0    | 0   | 0      | 1   | 0   | 0   | NF     | 1        | 1   |
| 34                        | 46  | LMS          | 1     | 0   | 0    | 1   | 0      | 1   | 0   | 0   | A      | 1        | 1   |
| <b>Group-III (n = 13)</b> |     |              |       |     |      |     |        |     |     |     |        |          |     |
| 35                        | 60  | LMS - Rec    | 0     | 0   | 0    | 0   | 1      | 0   | 0   | 0   | D      | 1        | 0   |
| 36                        | 50  | LMS - Rec    | 0     | 0   | 0    | 0   | 0      | 1   | 1   | 1   | D      | 1        | 1   |
| 37                        | 53  | LMS - Rec    | 0     | 0   | 0    | 0   | 0      | 0   | 0   | 0   | NF     | 0        | 0   |
| 38                        | 52  | LMS - Rec    | 0     | 0   | 0    | 0   | 0      | 0   | 0   | 0   | D      | 0        | 0   |
| 40                        | 49  | LMS - Rec    | 0     | 0   | 0    | 1   | 0      | 0   | 0   | 0   | A      | 0        | 1   |
| 41                        | 54  | LMS - Rec    | 0     | 1   | 0    | 1   | 0      | 1   | 0   | 1   | A      | 0        | 1   |
| 42                        | 49  | LMS - Rec    | 1     | 0   | 0    | 1   | 0      | 1   | 0   | 1   | NF     | 1        | 1   |
| 43                        | 55  | LMS - Rec    | 1     | 1   | 0    | 1   | 0      | 1   | 1   | 1   | A      | 1        | 1   |
| 44                        | 46  | LMS - Rec    | 1     | 0   | 0    | 0   | 0      | 0   | 0   | 0   | A      | 1        | 0   |
| 45                        | 55  | LMS - Rec    | 1     | 0   | 0    | 1   | 0      | 1   | 1   | 1   | NF     | 1        | 1   |
| 46                        | 51  | LMS - Rec    | 1     | 0   | 0    | 0   | 0      | 1   | 0   | 1   | D      | 1        | 1   |
| 47                        | 79  | LMS - Rec    | 1     | 0   | 0    | 1   | 0      | 1   | 0   | 0   | A      | 1        | 1   |
| 48                        | 48  | LMS - Rec    | 1     | 0   | 0    | 1   | 0      | 1   | 0   | 0   | A      | 1        | 1   |
| <b>Group-IV (n = 9)</b>   |     |              |       |     |      |     |        |     |     |     |        |          |     |
| 49                        | 46  | LMS - Met    | 0     | 1   | 0    | 1   | 0      | 1   | 0   | 0   | A      | 0        | 1   |
| 50                        | 68  | LMS - Met    | 0     | 0   | 0    | 1   | 0      | 0   | 0   | 0   | A      | 0        | 1   |
| 51                        | 50  | LMS - Met    | 0     | 0   | 0    | 0   | 0      | 0   | 0   | 0   | D      | 0        | 0   |
| 52                        | 50  | LMS - Met    | 0     | 0   | 0    | 1   | 0      | 1   | 0   | 1   | D      | 0        | 1   |
| 53                        | 59  | LMS - Met    | 1     | 0   | 0    | 1   | 0      | 0   | 0   | 0   | A      | 1        | 1   |
| 54                        | 50  | LMS - Met    | 1     | 1   | 0    | 0   | 0      | 0   | 0   | 0   | D      | 1        | 1   |
| 55                        | 58  | LMS - Met    | 1     | 1   | 0    | 1   | 0      | 0   | 0   | 0   | D      | 1        | 1   |
| 56                        | 47  | LMS - Met    | 1     | 0   | 0    | 1   | 0      | 1   | 0   | 0   | A      | 1        | 1   |
| 57                        | 68  | LMS - Met    | 1     | 0   | 0    | 1   | 0      | 1   | 0   | 0   | NF     | 1        | 1   |
| <b>Group-V (n = 8)</b>    |     |              |       |     |      |     |        |     |     |     |        |          |     |
| 39                        | 58  | ESS, LG, Rec | 0     | 0   | 0    | 0   | 0      | 0   | 0   | 0   | A      | 0        | 0   |
| 58                        | 46  | ESS, HG      | 0     | 0   | 0    | 0   | 0      | 0   | 0   | 0   | D      | 0        | 0   |
| 59                        | 44  | ESS, HG      | 0     | 0   | 0    | 0   | 0      | 0   | 0   | 0   | A      | 0        | 0   |
| 60                        | 60  | ESS, HG      | 0     | 0   | 0    | 0   | 0      | 0   | 0   | 0   | NF     | 0        | 0   |
| 61                        | 42  | ESS, HG      | 0     | 0   | 0    | 0   | 0      | 0   | 0   | 0   | NF     | 0        | 0   |
| 62                        | 48  | ESS, HG      | 0     | 0   | 0    | 0   | 0      | 0   | 0   | 0   | A      | 0        | 0   |
| 63                        | 65  | ESS, HG      | 1     | 0   | 0    | 0   | 1      | 0   | 0   | 0   | D      | 1        | 0   |
| 64                        | 74  | ESS, HG      | 1     | 0   | 0    | 1   | 0      | 0   | 0   | 0   | NF     | 1        | 1   |
| <b>Group-VI (n = 4)</b>   |     |              |       |     |      |     |        |     |     |     |        |          |     |
| 65                        | 45  | STUMP        | 0     | 0   | 0    | 0   | 0      | 0   | 0   | 0   | NF     | 0        | 0   |
| 66                        | 31  | STUMP        | 0     | 1   | 0    | 0   | 0      | 0   | 0   | 0   | NF     | 0        | 1   |
| 67                        | 64  | STUMP        | 1     | 1   | 0    | 1   | 0      | 0   | 0   | 0   | NF     | 1        | 1   |
| 68                        | 41  | STUMP        | 1     | 1   | 0    | 1   | 0      | 0   | 0   | 0   | A      | 1        | 1   |

LM, leiomyoma; LMS, leiomyosarcoma; Rec, recurrent; Met, metastatic leiomyosarcoma; ESS, endometrial stromal sarcoma; LG, low grade; HG, high grade; STUMP, smooth muscle tumor of uncertain malignant potential; PD-L1, programmed death-ligand 1; PD-1, programmed cell death protein 1; CTLA-4, cytotoxic T-lymphocyte-associated protein 4; IDO, indoleamine 2,3-dioxygenase; TC, tumor cell; LC, lymphoid cell; A, alive; D, dead; NF, no follow-up.
